# Supplementary material
Source: Springer Nature journal article supplement (https://www.springermedizin.de/resource/supplementary/12916_2012_718_MOESM4_ESM.pdf/9598740)

**a spleen**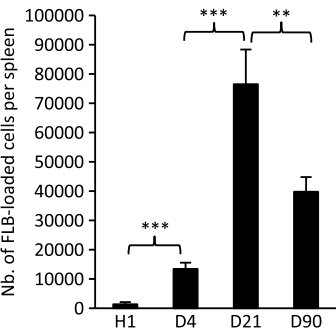**c blood**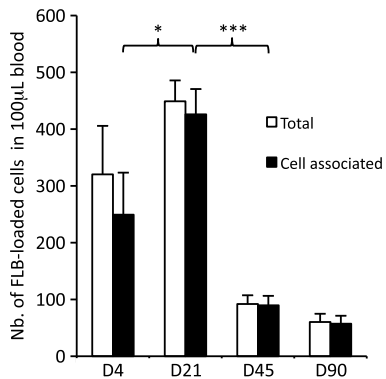**e DLNs**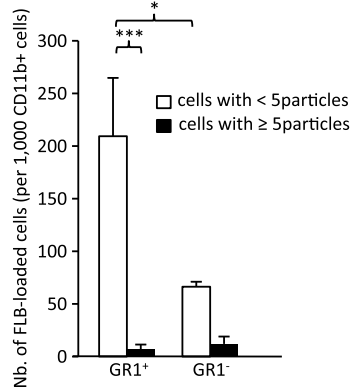**b**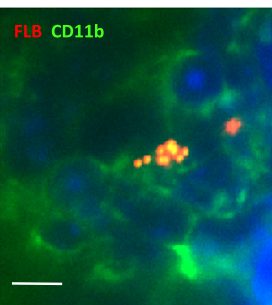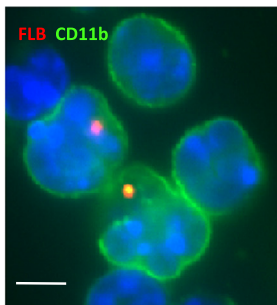**d**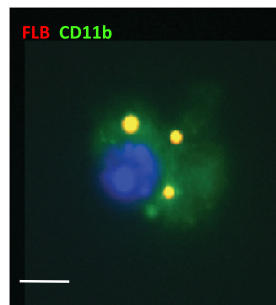**f spleen**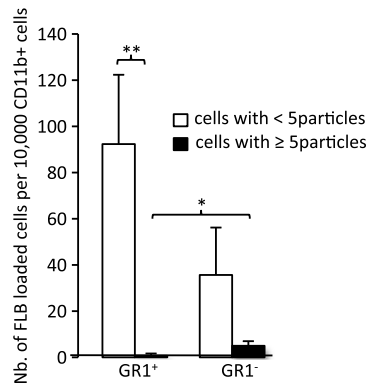

Supplement: MOESM4 [file 9598740]
